# Supplementary material for: How Breast Cancer Patients Want to Search for and Retrieve Information From Stories of Other Patients on the Internet: an Online Randomized Controlled Experiment
Source: PubMed Central journal article supplement (PMC2855205; doi:10.2196/jmir.1215), 2010-03-09
Supplement: jmir_v12i1e7_app2.pdf [file jmir_v12i1e7_app2.pdf]

### Multimedia Appendix 1:

Screenshots illustrating the search page and the list of retrieved stories for each of the 4 search conditions (i.e., control, story topics, writer profile, and combination condition).

Appendix to:

Overberg R, Otten W, De Man A, Toussaint P, Westenbrink J, Zwetsloot-Schonk B. How breast cancer patients want to search for and retrieve information from stories of other patients on the Internet: an online randomised controlled experiment.

Screenshot 1a: The search page of the control group.

The Amazones - Windows Internet Explorer

http://www.msbi.nl/verhalen/

File Edit View Favorites Tools Help

The Amazones

Home | Wie zijn wij | Ervaringsverhalen

**The Amazones**

Jonge vrouwen met borstkanker

Steun de Stichting

The folders below contain the stories sorted alphabetically by writer name.

|   |   |   |   |   |   |   |   |   |
|---|---|---|---|---|---|---|---|---|
| A | B | C | D | E | F | G | H | I |
| J | K | L | M | N | O | P | Q | R |
| S | T | U | V | W | X | Y | Z | # |

©2004-2007  
De Amazones  
Atlas Interactive Media

Done Local intranet 100%

Screenshot 1b: A list of stories retrieved in the control group.

The Amazones - Windows Internet Explorer

http://www.msbi.nl/verhalen/

File Edit View Favorites Tools Help

The Amazones

DE AMAZONES Jonge vrouwen met borstkanker

Stort een donatie op giro:

Home | Wie zijn wij | Ervaringsverhalen

<-Back | Afro | Amazone | Angel | Angel70 | Anita-U2 | Anja | Annie | Anto | Ar | Asmas

The Amazones

Ervaringsverhalen

Select one of the names listed above to read a story.

©2004-2007  
De Amazones  
Atlas Interactive Media

Done Local intranet 100%

Screenshot 2a: The search page of the story topics group.

The Amazones - Windows Internet Explorer

http://www.msbi.nl/verhalen/

File Edit View Favorites Tools Help

The Amazones

DE AMAZONES Jonge vrouwen met borstkanker

Stort een donatie op giro:

Home | Wie zijn wij | Ervaringsverhalen

The Amazones

Use the form below to search for stories.

Story topics:

Diagnosis

- feelings about diagnosis

Treatment

- Decision-making about treatment
  - having no choice
  - breast conserving surgery or mastectomy?
  - adjuvant treatment or not?
  - reconstruction or not?
  - prophylactic mastectomy other breast
  - ovary removal
  - other
- coping with treatment
- treatment side effects
  - arm lymphedema
  - hair loss
  - fatigue
  - nerve pain
  - hot flashes
  - skin problems
  - other

Health care system

- delay in/errors at diagnosis
- waiting for test results
- contact with medical staff
  - support
  - lack of understanding
- how treatment was performed
  - satisfied
  - dissatisfied
- second opinion

Living with it

- work & insurance

©2004-2007  
De Amazones  
Atlas Interactive Media

Local intranet 100%

Screenshot 2b: A list of stories retrieved in the story topics group.

The Amazones - Windows Internet Explorer  
http://www.msbi.nl/verhalen/

File Edit View Favorites Tools Help

The Amazones

**DE AMAZONES** Jonge vrouwen met borstkanker

Stort een donatie op giro: **4340044**

Home | Wie zijn wij | Ervareingsverhalen

The Amazones

**16 stories were found:**

The number of pink ribbons (0–5) indicates to what extent a story matches with your search.

**Pimmie**   
Topics found: coping with treatment, hair loss, breast conserving surgery or mastectomy?

**The stories below do not completely match with your search:**

**Jose3**   
Topics found: coping with treatment, breast conserving surgery or mastectomy?

**Chica**   
Topics found: hair loss, breast conserving surgery or mastectomy?

**Lia**   
Topics found: coping with treatment, breast conserving surgery or mastectomy?

**Monique 4**   
Topics found: coping with treatment, hair loss

**Maddy**   
Topics found: coping with treatment, breast conserving surgery or mastectomy?

**Roma**   
Topics found: coping with treatment, breast conserving surgery or mastectomy?

**Spiderdon99**   
Topics found: hair loss, breast conserving surgery or mastectomy?

**Leonie**   
Topics found: hair loss, breast conserving surgery or mastectomy?

**Hariette**   
Topics found: hair loss, breast conserving surgery or mastectomy?

**Katje**   
Topics found: coping with treatment, hair loss

**Lxxn**   
Topics found: coping with treatment, breast conserving surgery or mastectomy?

©2004-2007  
De Amazones  
Atlas Interactive Media

Done Local intranet 100%



Screenshot 3a: The search page of the author profile group.

The Amazones - Windows Internet Explorer  
http://www.msbi.nl/verhalen/

File Edit View Favorites Tools Help

The Amazones

**DE AMAZONES** Jonge vrouwen met borstkanker

Steun de Stichting **AMAZONES**

Home | Wie zijn wij | Ervaringsverhalen

The Amazones

**The Amazones**

Use the form below to search for stories.

Writer profile:

age at diagnosis 20-30 years

time since diagnosis less than 1/2 a year ago

children no

partner yes

treatment received

- breast conserving therapy
- mastectomy
- radiation therapy
- chemotherapy
- hormonal therapy
- immuno therapy (herceptin)
- breast reconstruction
- lymph node dissection

phase in the course of disease in first treatment period

search Reset

Ervaringsverhalen

©2004-2007  
De Amazones  
Atlas Interactive Media

Done Local intranet 100%

Screenshot 3b: A list of stories retrieved in the author profile group.

The Amazonas - Windows Internet Explorer

http://www.msbi.nl/verhalen/

File Edit View Favorites Tools Help

The Amazonas

DE AMAZONES Jonge vrouwen met borstkanker

Steun de Stichting AMAZONES

Home | Wie zijn wij | Ervaringsverhalen

The Amazonas

10 stories were found but none of the stories completely matches your search.

The number of pink ribbons (0–5) indicates to what extent a story matches with your search.

**Naia**   
 age at diagnosis: 31 Children: No Partner: Living together  
 Treatment received: Sept 2004: breast conserving surgery left breast \* Oct-Dec 2004 four AC chemo regimens \* Jan-Feb 2005: radiation therapy \* Jan 2005-? hormonal therapy  
 Time since diagnosis: 6 months Phase in the course of disease: in first treatment period

**Queensryche**   
 Age at diagnosis: 36 Children: No Partner: Living together  
 Treatment received: Breast conserving surgery, at this moment radiation therapy (35x) after that chemo regimens (4x AC)  
 Time since diagnosis: 3 months Phase in the course of disease: in first treatment period

**Jolanda**   
 Age at diagnosis: 24 Children: Unknown Partner: Unknown  
 Treatment received: ...underwent breast conservingsurgery...but also had many glands removed...radiation therapy...chemo regimen, six times...five years of hormonal therapy, I think...  
 Time since diagnosis: 5 months Phase in the course of disease: in first treatment period

**Miranda**   
 Age at diagnosis: 26 Children: No Children Partner: Living together  
 Treatment received: Mastectomy of left breast, lymph node dissection (5 tested positive), chemo regimen will start in January (5 cycles of FEC), Radiation and hormonal therapy will follow.  
 Time since diagnosis: 2 months Phase in the course of disease: in first treatment period

**Dio**   
 Age at diagnosis: 34 Children: Yes - 3 Partner: Living together  
 Treatment received: Breast conserving surgery, lymph node dissection and after that radiation therapy, chemotherapy, hormonal therapy.  
 Time since diagnosis: 3 months Phase in the course of disease: in first treatment period

**Mary**   
 Age at diagnosis: 37 Children: No Partner: Married  
 Treatment received: Breast conserving surgery, radiation therapy, 5 cycles of FEC, hormonal therapy. Now genetic testing.  
 Time since diagnosis: 5 months Phase in the course of disease: in first treatment period

**Ellen**  
 Age at diagnosis: 38 Children: 1 little son Partner: Gehuwd

©2004-2007 De Amazones Atlas Interactive Media

Done Local intranet 100%

Screenshot 4a: The search page of the combination group.

The Amazones - Windows Internet Explorer  
http://www.msbi.nl/verhalen/

File Edit View Favorites Tools Help

The Amazones

**DE AMAZONES** Jonge vrouwen met borstkanker  Stort een donatie op giro: **4340044** 

Home | Wie zijn wij | Ervaringsverhalen

The Amazones

**The Amazones**

Use the form below to search for stories.

**Story topics:**

**Diagnosis**

- feelings about diagnosis

**Treatment**

- decision-making about treatment
  - having no choice
  - breast conserving surgery or mastectomy?
  - adjuvant treatment or not?
  - reconstruction or not?
  - prophylactic mastectomy other breast
  - ovary removal
  - other
- coping with treatment
- treatment side effects
  - arm lymphedema
  - hair loss
  - fatigue
  - nerve pain
  - hot flashes
  - skin problems
  - other

**Health care system**

- delay in/errors at diagnosis
- waiting for test results
- contact with medical staff
  - support
  - lack of understanding
- how treatment was performed

**Writer profile:**

age at diagnosis

time since diagnosis

children

partner

treatment received

- breast conserving therapy
- mastectomy
- radiation therapy
- chemotherapy
- hormonal therapy
- immuno therapy (herceptin)
- breast reconstruction
- lymph node dissection

phase in the course of disease

©2004-2007 De Amazones

Done Local intranet 100%



Screenshot 4b: A list of stories retrieved in the combination group.

The screenshot shows a Windows Internet Explorer browser window displaying the website 'The Amazones'. The address bar shows the URL 'http://www.msbi.nl/verhalen/'. The website header includes the logo 'DE AMAZONES' and the text 'Jonge vrouwen met borstkanker'. A donation box on the right says 'Stort een donatie op giro: 4340044'. The main content area shows search results for '10 stories were found:'. The first story is for 'Maddy', with 5 pink ribbons indicating a high match. The second story is for 'Pimmie', with 4 pink ribbons. The third is for 'Miranda', with 2 pink ribbons. The fourth is for 'Christa', with 2 pink ribbons. The fifth is for 'Genara', with 2 pink ribbons. The sixth is for 'Moise75', with 2 pink ribbons. A 'New search' button is visible in the top right of the search results area. The browser's status bar at the bottom shows 'Done', 'Local intranet', and '100%' zoom.

The Amazones - Windows Internet Explorer  
http://www.msbi.nl/verhalen/

File Edit View Favorites Tools Help

The Amazones

DE AMAZONES Jonge vrouwen met borstkanker

Stort een donatie op giro: 4340044

Home | Wie zijn wij | Ervaringsverhalen

The Amazones

10 stories were found: New search

The number of pink ribbons (0–5) indicates to what extent a story matches with your search.

**Maddy**

Age: 30 Children: ...no kids of my own... Partner: ...my boyfriend...  
Treatment received: ...sentinel node treatment was no option...breast conserving surgery...had to undergo chemotherapy... have stopped taking zoladex and tamoxifen...  
Time since diagnosis: 2 years Phase in the course of disease: free of cancer  
Topics found: coping with treatment , breast conserving surgery or mastectomy?

**The stories below do not completely match with your search:**

**Pimmie**

Age: 32 Children: ...my daughter... Partner: ...my boyfriend...  
Treatment received: ...a breast conserving surgery...tumour was capricious and was not completely removed, mastectomy... chemo regimen...  
Time since diagnosis: a few months Phase in the course of disease: in first treatment period  
Topics found: coping with treatment , breast conserving surgery or mastectomy?

**Miranda**

Age: 26 Children: No Children Partner: Living together  
Treatment received: Mastectomy of left breast, lymph node dissection (5 tested positive), chemo regimen will start in January (5 cycles of FEC), Radiation and hormonal therapy will follow.  
Time since diagnosis: 2 months Phase in the course of disease: in first treatment period  
Topics found: coping with treatment

**Christa**

Age: 28 Children: ...1 daughter... Partner: ...married...  
Treatment received: ...to have a mastectomy of my whole breast...for a chemo regimen...  
Time since diagnosis: 1 year Phase in the course of disease: free of cancer  
Topics found: breast conserving surgery or mastectomy?

**Genara**

Age: 26 Children: Daughter (8) en 2 sons (2 en 1) Partner: Living together  
Treatment received: Mastectomy of left breast(11/12/04) Waiting for results for adjuvant treatment.  
Time since diagnosis: 1 month Phase in the course of disease: in first treatment period  
Topics found: breast conserving surgery or mastectomy?

**Moise75**

Age: 30 Children: Nee Partner: Samenwonend

©2004-2007 De Amazones Atlas Interactive Media

Done Local intranet 100%
